# Supplementary material for: Contrasting bioavailability of iron in glacial vs. groundwater to Antarctic phytoplankton: Linking iron uptake to geochemistry
Source: Research Square preprint supplement (doi:10.21203/rs.3.rs-7317240/v1), 2025-08-20
Supplement: Supplementary file 1 [file d55e726e89349e62dcfc087d.docx]

**Contrasting bioavailability of iron in glacial vs. groundwater to Antarctic phytoplankton: Linking iron uptake to geochemistry**

Jasmin Stimpfle, Florian Koch, Berenice Ebner, Christian Völkner, Rebecca Zitoun, Camila F. Sukekava, Sylvia G. Sander, Susann Henkel, Randelle M. Bundy, Angel Ruacho, Sabine Kasten, Scarlett Trimborn

**Supplementary Material**

**
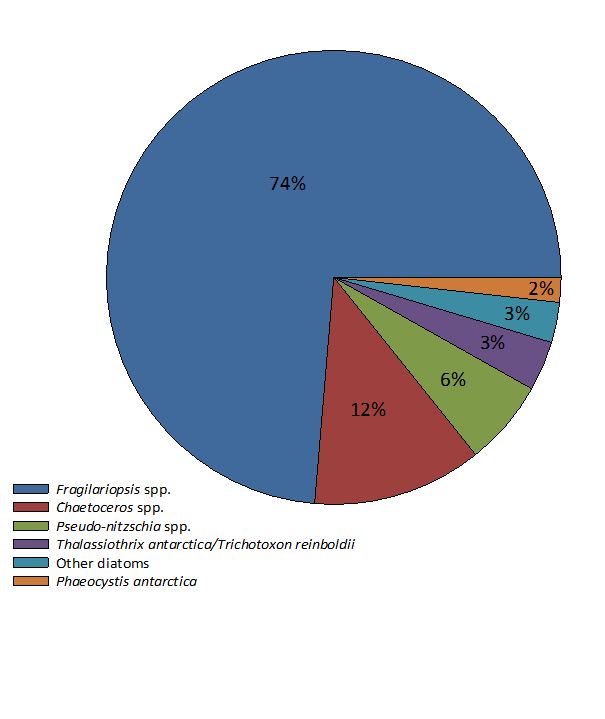
** **Supplementary Fig. 1.** **Taxonomic composition** of the collected and concentrated natural phytoplankton community, consisting of various diatom genera and *Phaeocystis antarctica*. Please note that unidentified flagellates accounted for 7% of this community, but are not shown in this figure.

**Supplementary Table 1.** **In-situ conditions at the sampling sites of the LCW and HCW**: Macronutrients (nitrate (NO3-), phosphate (PO4), silicate (SiOH4), chlorophyll a (Chl a), particulate organic carbon (POC), primary production (PP), photosynthetic efficiency (Fv/Fm), heterotrophic bacteria (HB). Values represent the mean ± SD (n = 3).

|  | **NO3- (µmol L-1)** | **PO4 (µmol L-1)** | **SiOH4 (µmol L-1)** | **Chl. a (µg L-1)** | **POC (mg L-1)** | **PP (mg C m-3 d-1)** | **Fv/Fm** | **HB  (cells mL-1)** |
| --- | --- | --- | --- | --- | --- | --- | --- | --- |
| **LCW (unfiltered)** | 19.02 ± 0.03 | 1.30 ± 0.00 | 12.56 ± 0.03 | 0.33 ± 0.01 | 0.14 ± 0.00 | 27.85 ± 0.58 | 0.28 ± 0.01 | 217352 ± 6500 |
| **HCW (unfiltered)** | 16.90 ± 0.07 | 1.09 ± 0.00 | 9.54 ± 0.01 | 3.78 ± 0.24 | 0.37 ± 0.00 | 139.10 ± 11.11 | 0.43 ± 0.01 | 383049 ± 54642 |

**Supplementary Table 2.** **Fe speciation, dissolved organic matter (DOC) and Fe uptake rates in the HCW.** Dissolved Fe concentration (dFe), total ligand concentration (LT), excess ligand concentration (L*), conditional stability constants (), complexation capacity (α = LT x 10^, where LT is in mol L-1), concentration of free inorganic Fe (Fe’). For LT, , α and Fe’, values are represented ± the uncertainty of the fitting method. Statistically significant differences in uptake rates (p < 0.05) are indicated by small letters (n = 3). Fe speciation parameters and DOC were taken before the addition of the pre-concentrated phytoplankton community (see methods section).

|  | **dFe (nM)** | **LT (nM)** | **L* (nM)** |  | **α** | **Fe’ (pM)** | **DOC (µmol L-1)** | **Fe uptake (pmol L-1 d-1)** |
| --- | --- | --- | --- | --- | --- | --- | --- | --- |
| **abiotic** | 0.116 ± 0.009 | 1.10 ± 0.48 | 0.98 | 10.49 ± 0.45 | 33.98 | 2.80 ± 3.12 | 73.52 ± 0.76 | 17.96 ± 4.03 a |
| **biotic** |  |  |  |  |  |  |  | 22.53 ± 1.48 a |


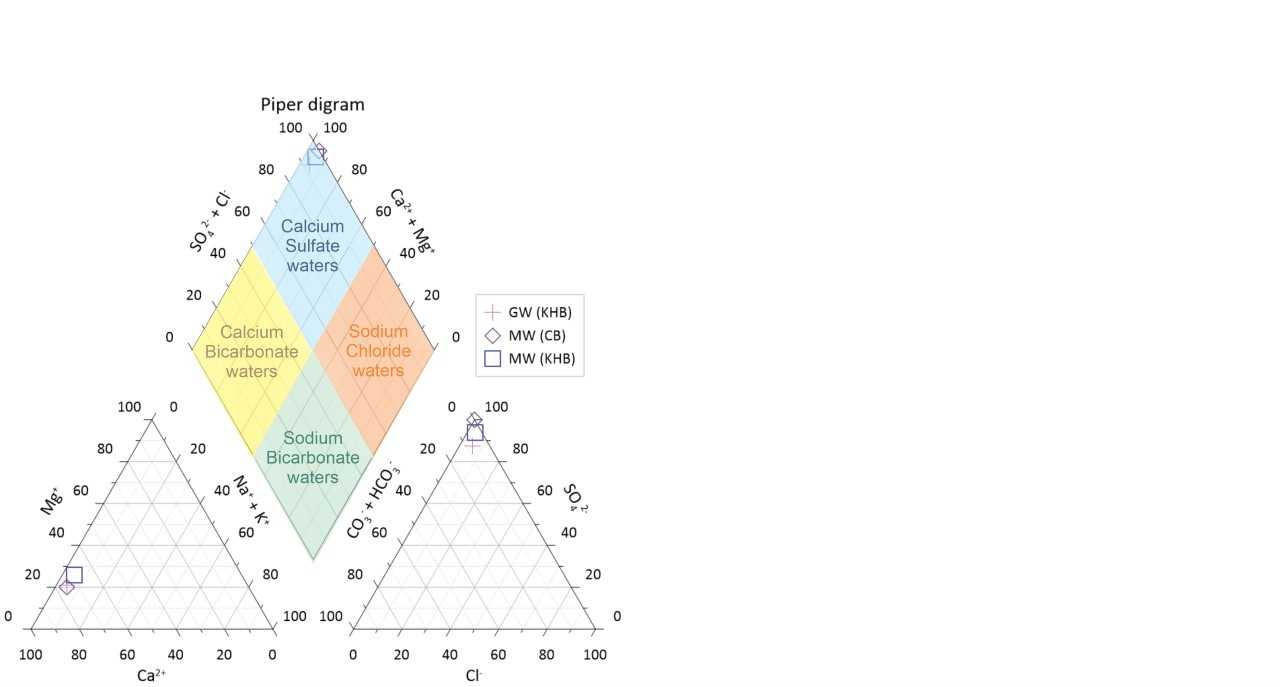
**Supplementary Figure 2.** **Piper diagram** 1. Illustration of the major ion chemistry of the natural Fe sources. All samples are within the calcium sulfate type (blue).

**Supplementary Table 3. Sampling time and locations and auxiliary data.** Fe concentrations were measured in 0.2µm filtered samples via ICP-MS.

|  | **Date** | **Latitude** | **Longitude** | **dFe (nM)** | **Salinity** |
| --- | --- | --- | --- | --- | --- |
| LCW | 24.11.2022 | -54.6013 | -43.9022 | 0.42 | 32.2 |
| HCW | 30.11.2022 | -54.4135 | -37.5876 | 0.12 | 33.6 |
| Phytoplankton community | 9.12.2022 | -53.3890 | -29.1840 | - | - |
| GW (KHB) | 29.11.2022 | -54.1447 | -37.2786 | 370.20 | 0.00 |
| MW (KHB) | 29.11.2022 | -54.1453 | -37.2758 | 71.06 | 0.20 |
| MW (CB) | 4.12.2022 | -54.3692 | -36.4939 | 477.20 | 0.00 |
| EW (CB) | 4.12.2022 | -54.3691 | -36.4942 | 9.85 | 25.40 |

**Supplementary Table 4. Concentrations of humic like substances (HS)** in incubations 24h after the addition of different Fe sources.Suwannee River Fulvic Acid (SRFA), limit of detection (LOD) >0.04 nM.

|  | **HS (nM)** |
| --- | --- |
| **LCW** | 0.15 ± 0.04 |
| + GW (KHB) | ≤ LOD |
| + MW (KHB) | ≤ LOD |
| +MW (CB) | ≤ LOD |
| + EW (CB) | 0.40 ± 0.06 |
| + FeCl3 | ≤ LOD |
| **HCW** | ≤ LOD |
| + GW (KHB) | ≤ LOD |
| + MW (KHB) | ≤ LOD |
| +MW (CB) | ≤ LOD |
| + EW (CB) | 0.20 ± 0.04 |
| + FeCl3 | ≤ LOD |

**References**

1. Piper, A. M. A graphic procedure in the geochemical interpretation of water‐analyses. *Eos, Transactions American Geophysical Union* **25**, 914–928 (1944).
